# Supplementary material for: Photothermal ablation of murine melanomas by Fe 3 O 4 nanoparticle clusters
Source: publisher site journal article supplement (doi:10.3762/bjnano.13.20), 2022-02-22
Supplement: Additional file 1 [file 2190-4286-13-20-S1.pdf]

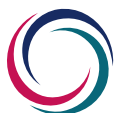

## Supporting Information

for

### Photothermal ablation of murine melanomas by Fe<sub>3</sub>O<sub>4</sub> nanoparticle clusters

Xue Wang, Lili Xuan and Ying Pan

*Beilstein J. Nanotechnol.* **2022**, *13*, 255–264. [doi:10.3762/bjnano.13.20](https://doi.org/10.3762/bjnano.13.20)

## Additional figures

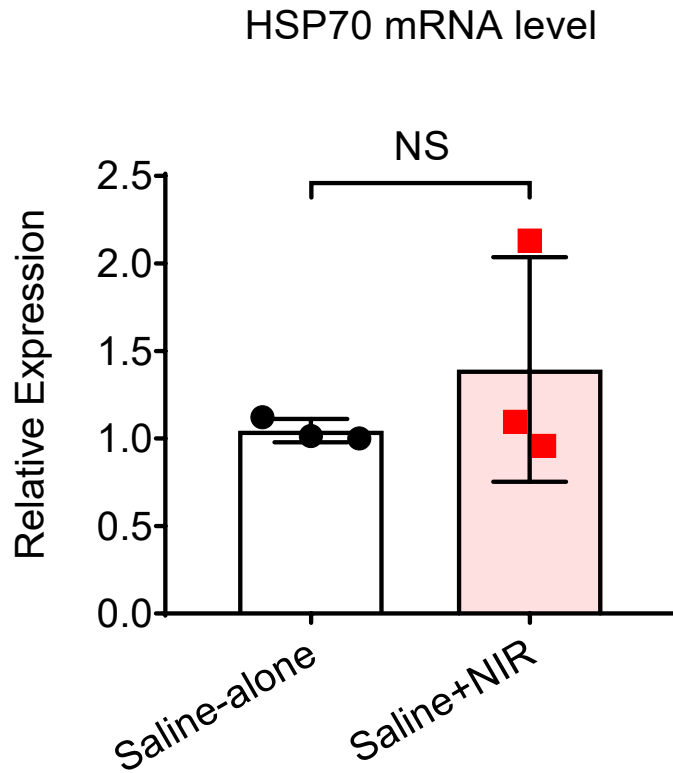

**Figure S1: NIR irradiation did not change mRNA expression of HSP70 in A375 cells.** A375 cells were treated with vehicle control saline, then left either intact or exposed to NIR irradiation for 10 min. After another 24 h, cells were harvested and qPCR was performed to measure mRNA expression of *Hsp70*. Results were first normalized to the internal standard *Gapdh* and then expressed as fold-change over saline-alone control as determined by the delta-delta CT method. NS, nonsignificant.

NPCs (2.5 mg/kg)

-

+

NIR Irradiation

-

+

Tumor size

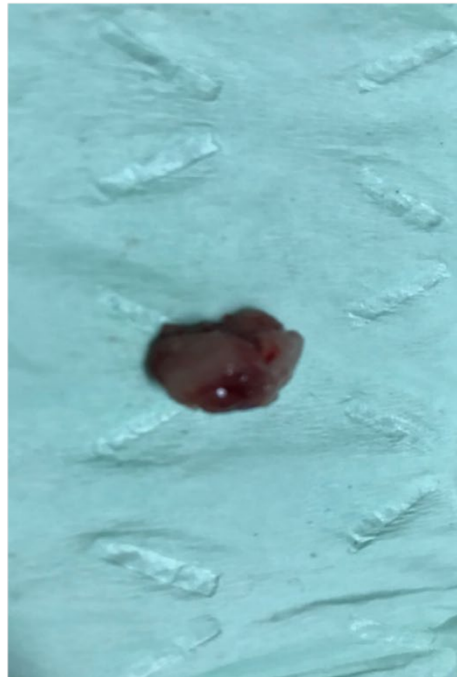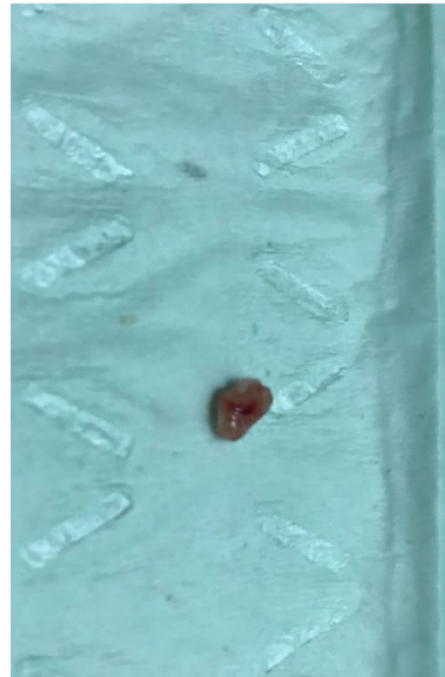

**Figure S2: Original full images of harvested tumor xenografts.** Tumors were isolated from BALB/c mice that were intratumorally injected with either NPCs or saline, then were irradiated with or without NIR. Pictures were taken using the inbuilt camera of an iPhone. Magnification of the two images is identical as justified by the rectangular marks of similar size present on the background mat.
